# Supplementary material
Source: MDPI journal article supplement (https://www.mdpi.com/2076-3417/13/6/3696)
Supplement: s1 [file s1]

# Supplementary Materials: Nitrogenous Bases in Relation to the Colloidal Silver Phase: Adsorption, Kinetic, and Morphology Investigation

Małgorzata Zienkiewicz-Strzałka and Magdalena Błachnio

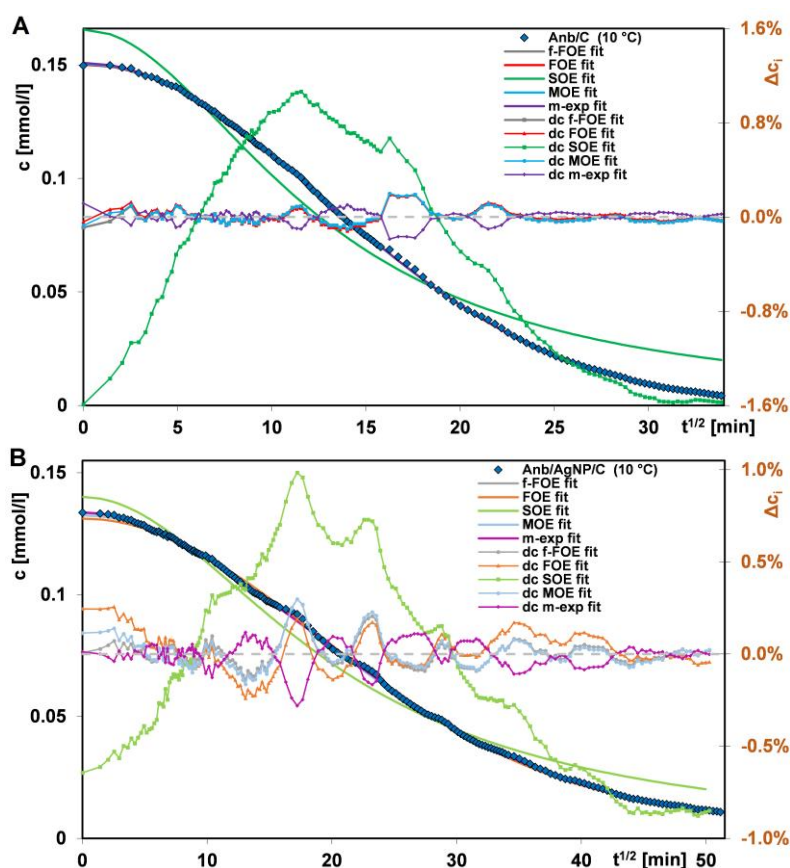

**Figure S1.** Comparison of the kinetics of adenosine adsorption from the one- (A) and two-component (B) solutions at 10 °C on the activated carbon RIAA fitted to various equations.

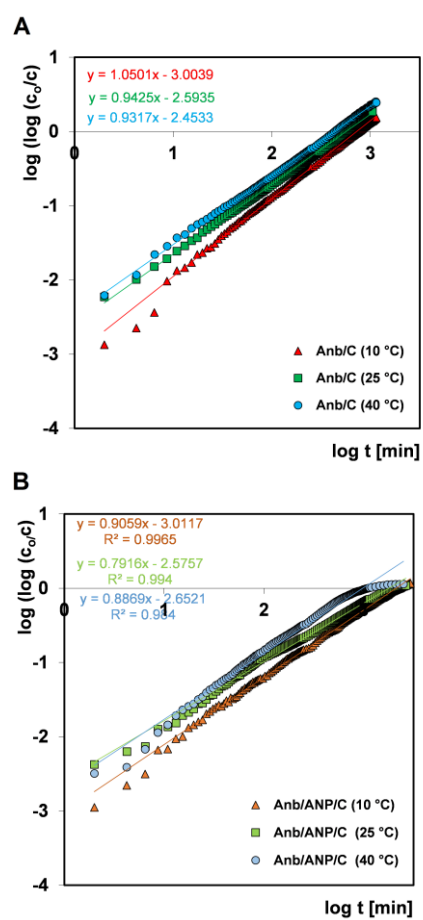

**Figure S2.** Comparison of Bangham plots for adenosine adsorption from the one- (**A**) and two-component (**B**) solutions on the activated carbon RIAA.

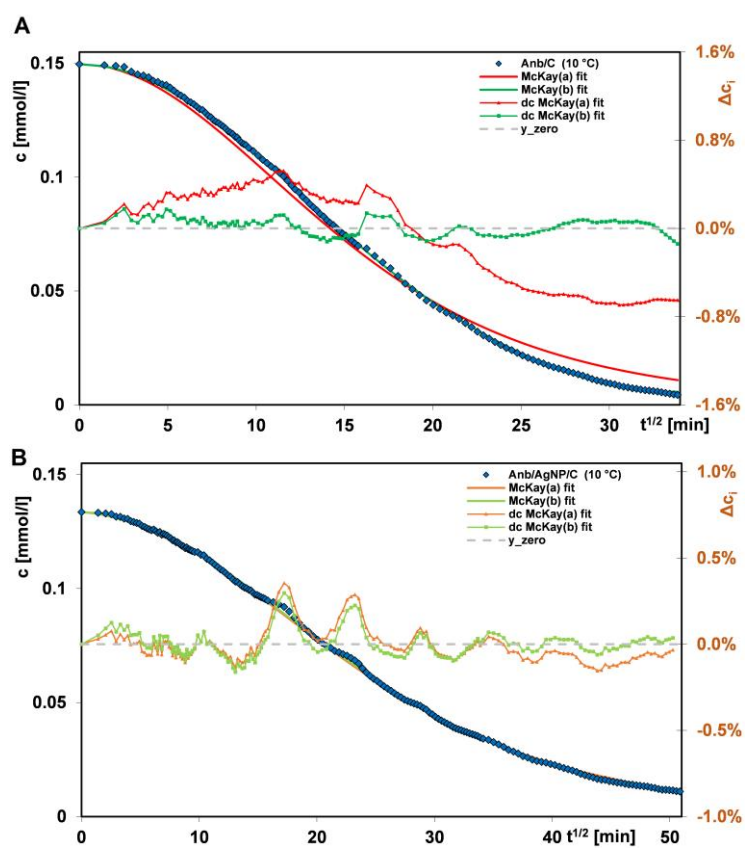

**Figure S3.** Comparison of kinetics of adenosine adsorption from the one- (A) and two-component (B) solutions at 10 °C on the activated carbon RIAA fitted to McKay model.

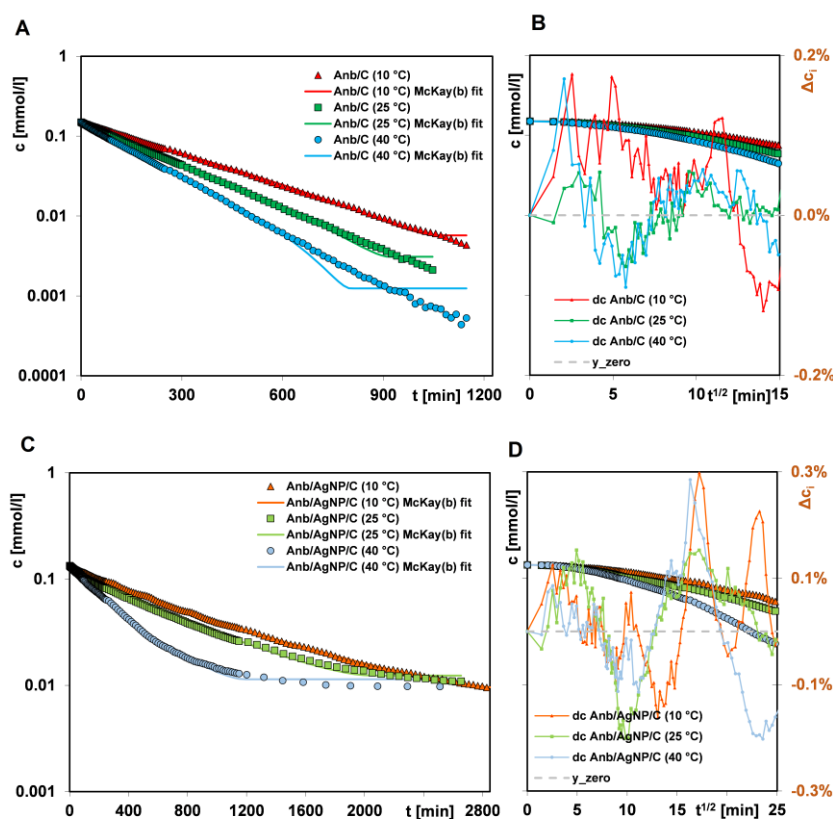

**Figure S4.** Comparison of adenosine adsorption kinetics from the one-component (A,B) and bi-component solutions (C,D) on the activated carbon RIAA at 10, 25, and 40 °C. The lines correspond to the fitted McKay model.

**Table S1.** Comparison of fitting as relative deviation, SD(c)/c<sub>0</sub> for kinetic models and equations.

| System             | fit     | log k*      | t <sub>0.5</sub> [min] | u <sub>eq</sub> | 1-R <sup>2</sup>      |
|--------------------|---------|-------------|------------------------|-----------------|-----------------------|
| Anb/C (10 °C)      | m-exp   | -2.51 (av.) | 224 (av.)              | 1               | 1.10·10 <sup>-4</sup> |
|                    |         | -1.75       | 39                     |                 |                       |
|                    |         | -2.52       | 229                    |                 |                       |
|                    | FOE     | -2.51       | 226                    | 0.9988          | 1.32·10 <sup>-4</sup> |
|                    | SOE     | -2.20       | 158                    | 1               | 4.81·10 <sup>-2</sup> |
|                    | MOE     | -2.52       | 225                    | 1               | 1.21·10 <sup>-4</sup> |
|                    | f-FOE   | -2.51       | 225                    | 1               | 1.18·10 <sup>-4</sup> |
|                    | PDM (a) |             | 213                    | 0.9999          | 7.29·10 <sup>-3</sup> |
|                    | PDM (b) |             | 215                    | 0.7784          | 2.17·10 <sup>-4</sup> |
| Anb/C (25 °C)      | m-exp   | -2.37 (av.) | 163 (av.)              | 1               | 2.35·10 <sup>-5</sup> |
|                    |         | -1.42       | 18                     |                 |                       |
|                    |         | -2.39       | 172                    |                 |                       |
|                    | FOE     | -2.38       | 166                    | 0.9958          | 2.10·10 <sup>-4</sup> |
|                    | SOE     | -2.06       | 114                    | 1               | 4.85·10 <sup>-2</sup> |
|                    | MOE     | -2.41       | 165                    | 1               | 1.15·10 <sup>-4</sup> |
|                    | f-FOE   | -2.38       | 163                    | 1               | 7.93·10 <sup>-5</sup> |
|                    | PDM (a) |             | 152                    | 0.9999          | 4.99·10 <sup>-3</sup> |
|                    | PDM (b) |             | 159                    | 0.8486          | 6.84·10 <sup>-5</sup> |
| Anb/C (40 °C)      | m-exp   | -2.25 (av.) | 122 (av.)              | 1               | 3.98·10 <sup>-5</sup> |
|                    |         | -1.06       | 8                      |                 |                       |
|                    |         | -1.59       | 27                     |                 |                       |
|                    |         | -2.29       | 135                    |                 |                       |
|                    | FOE     | -2.27       | 129                    | 0.9966          | 4.13·10 <sup>-4</sup> |
|                    | SOE     | -1.93       | 84                     | 1               | 5.02·10 <sup>-2</sup> |
|                    | MOE     | -2.32       | 126                    | 1               | 2.19·10 <sup>-4</sup> |
|                    | f-FOE   | -2.26       | 124                    | 1               | 1.52·10 <sup>-4</sup> |
|                    | PDM (a) |             | 115                    | 0.9999          | 4.17·10 <sup>-3</sup> |
|                    | PDM (b) |             | 124                    | 0.8823          | 1.17·10 <sup>-4</sup> |
| Anb/AgNP/C (10 °C) | m-exp   | -2.86 (av.) | 497 (av.)              | 0.9489          | 2.33·10 <sup>-4</sup> |
|                    |         | -1.92       | 57                     |                 |                       |
|                    |         | -2.89       | 537                    |                 |                       |
|                    | FOE     | -2.86       | 506                    | 0.9386          | 5.73·10 <sup>-4</sup> |
|                    | SOE     | -2.62       | 420                    | 1               | 1.86·10 <sup>-2</sup> |
|                    | MOE     | -2.98       | 511                    | 0.9651          | 2.94·10 <sup>-4</sup> |
|                    | f-FOE   | -2.87       | 503                    | 0.9609          | 2.40·10 <sup>-4</sup> |
|                    | PDM (a) |             | 529                    | 0.9999          | 4.29·10 <sup>-4</sup> |
|                    | PDM (b) |             | 482                    | 0.8567          | 2.84·10 <sup>-4</sup> |
| Anb/AgNP/C (25 °C) | m-exp   | -2.68 (av.) | 333 (av.)              | 0.9316          | 1.96·10 <sup>-4</sup> |
|                    |         | -1.74       | 38                     |                 |                       |
|                    |         | -2.80       | 434                    |                 |                       |
|                    | FOE     | -2.71       | 360                    | 0.8991          | 4.31·10 <sup>-3</sup> |
|                    | SOE     | -2.53       | 338                    | 1               | 7.29·10 <sup>-3</sup> |
|                    | MOE     | -3.20       | 378                    | 0.9888          | 1.60·10 <sup>-3</sup> |
|                    | f-FOE   | -2.74       | 345                    | 0.9641          | 7.31·10 <sup>-4</sup> |
|                    | PDM (a) |             | 394                    | 0.9999          | 1.38·10 <sup>-3</sup> |
|                    | PDM (b) |             | 317                    | 0.0507          | 5.23·10 <sup>-4</sup> |

|                           |         |             |           |        |                       |
|---------------------------|---------|-------------|-----------|--------|-----------------------|
| <b>Anb/AgNP/C (40 °C)</b> | m-exp   | −2.46 (av.) | 198 (av.) | 0.9273 | 3.03·10 <sup>−4</sup> |
|                           |         | −1.56       | 25        |        |                       |
|                           |         | −2.48       | 210       |        |                       |
|                           | FOE     | −2.46       | 202       | 0.9218 | 4.89·10 <sup>−4</sup> |
|                           | SOE     | −2.24       | 175       | 1      | 1.75·10 <sup>−2</sup> |
|                           | MOE     | −2.50       | 201       | 0.9281 | 4.29·10 <sup>−4</sup> |
|                           | f-FOE   | −2.47       | 199       | 0.9294 | 3.86·10 <sup>−4</sup> |
|                           | PDM (a) |             | 214       | 0.9999 | 1.37·10 <sup>−3</sup> |
|                           | PDM (b) |             | 194       | 0.8670 | 5.66·10 <sup>−4</sup> |
